# Supplementary material
Source: Research Square preprint supplement (doi:10.21203/rs.3.rs-10228154/v1)
Supplement: Supplementary file 1 [file bf686e3423bdba715ae122b7.docx]

**Table S1.** Basic characteristics of the settlements included in the study

| **District** | **Village** | **No. of**  **farmers*** | **Irrigated**  **area**  **(ha)** | **Rainfed**  **Area**  **(ha)** | **Tractor**  **ownership** | **Olive**  **orchards**  **(ha)** | **Cattle**  **Population (head)** | **Small**  **Ruminants**  **(head)** | **Beehives** | **Daily milk production (tons)** |
| --- | --- | --- | --- | --- | --- | --- | --- | --- | --- | --- |
| Çine | Akçaova | 214 | 16,83 | 445,27 | 49 | 384,14 | 5820 | 943 | 415 | 34,92 |
| Çine | Seferler | 107 | 68,95 | 142,37 | 37 | 88,01 | 2480 | 575 | 1590 | 14,88 |
| Karpuzlu | Akçaabat | 78 | 7,6 | 255,7 | 50 | 60,4 | 3180 | 5084 | 3890 | 2,68 |
| Karpuzlu | Ektirli | 92 | 167 | 424,1 | 30 | 428 | 2907 | 180 | 405 | 4,33 |
| Karpuzlu | Meriçler | 78 | 9 | 442 | 15 | 398,8 | 1894 | - | 10103 | 0,05 |
| Karpuzlu | Umcular | 79 | 0 | 693,1 | 1 | 241,6 | 2412 | 105 | 1050 | 0,23 |
| Koçarlı | Esentepe | 61 | 0,01 | 804 | 2 | 730 | 1432 | - | 1847 | - |
| Koçarlı | Gözkaya | 68 | 10 | 400 | 2 | 307,9 | 1998 | 287 | 628 | - |
| Koçarlı | Karacaören | 35 | 53 | 300 | 3 | 67 | 1031 | 212 | 215 | - |
| Koçarlı | Kızılkaya | 73 | 0,3 | 0,2 | 6 | 0,2 | 1423 | 199 | 120 | - |
| Koçarlı | Mersinbelen | 79 | 0 | 361 | 60 | 62,3 | 1613 | 37 | - | - |
| Söke | Çavdar | 76 | 36,73 | 214,96 | 30 | 180,2 | 2500 | 50 | 29409 | 1 |
| Söke | Demirçay | 36 | 2,79 | 186,12 | 7 | 184,7 | 900 | 60 | 600 | 0,15 |
| Söke | Karakaya | 75 | 21,13 | 1844,13 | 20 | 1914,4 | 1200 | 485 | 14316 | 0,5 |
| Söke | Serçin | 82 | 1095,65 | 257,27 | 50 | 257,7 | 1750 | 125 | - | 0,15 |
| Milas | Çomakdağ | 198 | 35,15 | 6636,54 | - | 6568,96 | 1803 | 4 | 275 | 0,7 |
| Milas | Ketendere | 108 | 84,02 | 3407,51 | - | 3231,31 | 1201 | 314 | 700 | 0,5 |
| Milas | Sakarkaya | 115 | 199,37 | 2052,77 | 5 | 1891,6 | 2626 | 1528 | 30654 | 3,5 |
| Milas | Sarıkaya | 69 | 63,77 | 4910,28 | 1 | 4529,39 | 914 | - | 920 | 0,3 |
| Yatağan | Hacıveliler | 131 | 11,67 | 637,57 | 15 | 600,91 | 825 | 1881 | - | 3,5 |
| Yatağan | Turgutlar | 33 | 0,3 | 248,66 | 5 | 247,21 | 1177 | 868 | 6849 | 4,9 |
| Yatağan | Yava | 62 | 42,32 | 846,17 | 25 | 715,13 | 871 | 458 | - | 3,7 |

*Number of farmers refers to the households registered in the National Farmer Registration System.

**Table S2.** Normalized values of water source types across settlements

| **Settlement** | **Spring**  **water** | **Pond** | **Stream/**  **Creek** | **Municipal network** | **Tractor-based**  **transport** |
| --- | --- | --- | --- | --- | --- |
| Çine | 0.00 | 0.00 | 1.00 | 0.00 | 0.00 |
| Karpuzlu | 1.00 | 1.00 | 0.00 | 0.20 | 0.00 |
| Koçarlı | 0.80 | 0.50 | 0.00 | 0.00 | 0.57 |
| Söke | 0.40 | 0.45 | 0.00 | 0.40 | 1.00 |
| Milas | 0.90 | 0.05 | 1.00 | 1.00 | 0.71 |
| Yatağan | 0.50 | 0.05 | 0.50 | 0.00 | 0.00 |

Normalization was performed separately for each variable using the observed minimum and maximum values.

**Table S3.** Normalized values of environmental damage indicators

| **Settlement** | **Olive grove**  **damage** | **Cultivated land**  **damage** | **Water source**  **damage** |
| --- | --- | --- | --- |
| Çine | 0.50 | 1.00 | 0.00 |
| Karpuzlu | 1.00 | 0.00 | 0.00 |
| Koçarlı | 0.50 | 0.00 | 1.00 |
| Söke | 0.50 | 0.00 | 0.00 |
| Milas | 0.00 | 0.00 | 0.00 |
| Yatağan | 0.50 | 0.00 | 0.00 |

Normalization was performed separately for each variable using the observed minimum and maximum values.

**Table S4.** Normalized ecosystem service indicators across settlements

| **Settlement** | **Fertilization** | **Olive grove**  **maintenance** | **Fire**  **prevention** | **Ecological**  **production** | **Weed**  **removal** | **Soil**  **aeration** |
| --- | --- | --- | --- | --- | --- | --- |
| Çine | 0.00 | 1.00 | 0.00 | 0.00 | 0.00 | 0.00 |
| Karpuzlu | 1.00 | 0.25 | 1.00 | 1.00 | 0.33 | 0.00 |
| Koçarlı | 0.54 | 0.00 | 0.44 | 0.40 | 0.00 | 0.00 |
| Söke | 0.77 | 0.50 | 0.56 | 1.00 | 0.33 | 0.00 |
| Milas | 0.46 | 0.50 | 0.56 | 0.00 | 1.00 | 1.00 |
| Yatağan | 0.31 | 0.00 | 0.22 | 0.60 | 0.00 | 1.00 |

Normalization was performed separately for each variable using the observed minimum and maximum values.
